# Supplementary material
Source: PubMed Central journal article supplement (PMC4111776)
Supplement: NIHMS580846-supplement-2.pdf [file NIHMS580846-supplement-2.pdf]

**Figure S1.** Full screen shot from HaploReg (<http://www.broadinstitute.org/mammals/haploreg/haploreg.php>, last accessed on 03/20/2014), when three xMHC SNPs (IDs in red) being highlighted in this study are queried for functional relevance and LD patterns in populations of African ancestry.

**HaploReg v2**

HaploReg is a tool for exploring annotations of the noncoding genome at variants on haplotype blocks, such as candidate regulatory SNPs at disease-associated loci. Using LD information from the 1000 Genomes Project, linked SNPs and small indels can be visualized along with their predicted chromatin state, their sequence conservation across mammals, and their effect on regulatory motifs. HaploReg is designed for researchers developing mechanistic hypotheses of the impact of non-coding variants on clinical phenotypes and normal variation.

**Update 2013.02.14: Version 2** now includes an expanded library of SNPs (based on dbSNP 137), motif instances (based on PWMs discovered from ENCODE experiments), enhancer annotations (adding 90 cell types from the Roadmap Epigenome Mapping Consortium), and eQTLs (from the GTex eQTL browser). In addition, LD calculations are provided based on the 1000 Genomes Phase 1 individuals, and  $r^2$  and  $D'$  measurements are available down to an  $r^2$  threshold of 0.2. Display improvements include improved cell metadata, gene metadata, and PWM display on the detail pages and the option for text output. Version 1 is available [here](#).

**Build Query** **Set Options** **Documentation**

Use one of the three methods below to enter a set of variants. If an  $r^2$  threshold is specified (see the Set Options tab), results for each variant will be shown in a separate table along with other variants in LD. If  $r^2$  is set to NA, only queried variants will be shown, together in one table.

Query (comma-delimited list of rsIDs OR a single region as chrN:start-end):

or, upload a text file (one refSNP ID per line):

or, select a GWAS:

Enhancer enrichment analysis  
No significant enrichment

DNase enrichment analysis  
No significant enrichment

Query SNP: **rs3094626** and variants with  $r^2 \geq 0.8$

| chr | pos (hg19) | LD (r <sup>2</sup> ) | LD (D') | variant          | Ref | Alt | AFR freq | AMR freq | ASN freq | EUR freq | SiPhy cons | Promoter histone marks | Enhancer histone marks | DNase | Proteins bound | eQTL tissues | Motifs changed     | GENCODE genes   | dbSNP func annot |
|-----|------------|----------------------|---------|------------------|-----|-----|----------|----------|----------|----------|------------|------------------------|------------------------|-------|----------------|--------------|--------------------|-----------------|------------------|
| 6   | 30323623   | 1                    | 1       | <b>rs3094626</b> | T   | C   | 0.38     | 0.36     | 0.45     | 0.37     |            |                        |                        |       |                |              | <b>Nrf-2,PRDM1</b> | 9kb 3' of RPP21 |                  |

Query SNP: **rs3134931** and variants with  $r^2 \geq 0.8$

| chr | pos (hg19) | LD (r <sup>2</sup> ) | LD (D') | variant          | Ref | Alt | AFR freq | AMR freq | ASN freq | EUR freq | SiPhy cons | Promoter histone marks | Enhancer histone marks      | DNase               | Proteins bound | eQTL tissues | Motifs changed | GENCODE genes | dbSNP func annot |
|-----|------------|----------------------|---------|------------------|-----|-----|----------|----------|----------|----------|------------|------------------------|-----------------------------|---------------------|----------------|--------------|----------------|---------------|------------------|
| 6   | 32190620   | 1                    | 1       | <b>rs3134931</b> | T   | C   | 0.45     | 0.36     | 0.56     | 0.31     |            |                        | <b>HMEC, Huvec, GM12878</b> | Th1,Fibrobl,Osteobl | <b>PU1</b>     |              | <b>p300</b>    | NOTCH4        | intronic         |

Query SNP: **rs2857114** and variants with  $r^2 \geq 0.8$

| chr | pos (hg19) | LD (r <sup>2</sup> ) | LD (D') | variant          | Ref | Alt | AFR freq | AMR freq | ASN freq | EUR freq | SiPhy cons | Promoter histone marks | Enhancer histone marks | DNase | Proteins bound | eQTL tissues | Motifs changed          | GENCODE genes       | dbSNP func annot |
|-----|------------|----------------------|---------|------------------|-----|-----|----------|----------|----------|----------|------------|------------------------|------------------------|-------|----------------|--------------|-------------------------|---------------------|------------------|
| 6   | 32779996   | 1                    | 1       | <b>rs2857114</b> | G   | A   | 0.51     | 0.59     | 0.72     | 0.66     |            |                        |                        |       |                |              | <b>9 altered motifs</b> | 543bp 3' of HLA-DOB |                  |
| 6   | 32780470   | 1                    | 1       | <b>rs2621331</b> | C   | T   | 0.51     | 0.58     | 0.67     | 0.66     |            |                        |                        |       |                |              | <b>8 altered motifs</b> | 69bp 3' of HLA-DOB  |                  |

**Figure S2.** Partial screen shot from HaploReg (<http://www.broadinstitute.org/mammals/haploreg/haploreg.php>, last accessed on 03/20/2014), when three xMHC SNPs (IDs in red) being highlighted in this study are queried for functional relevance and LD patterns in populations of European ancestry.

Query SNP: **rs3094626** and variants with  $r^2 \geq 0.8$

| chr | pos (hg19) | LD (r <sup>2</sup> ) | LD (D') | variant          | Ref | Alt | AFR freq | AMR freq | ASN freq | EUR freq | SiPhy cons | Promoter histone marks | Enhancer histone marks | DNase | Proteins bound | eQTL tissues | Motifs changed | GENCODE genes    | dbSNP func annot |
|-----|------------|----------------------|---------|------------------|-----|-----|----------|----------|----------|----------|------------|------------------------|------------------------|-------|----------------|--------------|----------------|------------------|------------------|
| 6   | 30323623   | 1                    | 1       | <b>rs3094626</b> | T   | C   | 0.38     | 0.36     | 0.45     | 0.37     |            |                        |                        |       |                |              | Nrf-2,PRDM1    | 9kb 3' of RPP21  |                  |
| 6   | 30338247   | 0.8                  | 0.95    | <b>rs3129813</b> | G   | A   | 0.44     | 0.35     | 0.44     | 0.34     |            |                        |                        |       |                |              | Hand1,Ncx,RFX5 | 24kb 3' of RPP21 |                  |
| 6   | 30338248   | 0.8                  | 0.95    | <b>rs3130357</b> | A   | G   | 0.44     | 0.35     | 0.44     | 0.34     |            |                        |                        |       |                |              | Hand1          | 24kb 3' of RPP21 |                  |

Query SNP: **rs3134931** and variants with  $r^2 \geq 0.8$

| chr | pos (hg19) | LD (r <sup>2</sup> ) | LD (D') | variant          | Ref | Alt | AFR freq | AMR freq | ASN freq | EUR freq | SiPhy cons | Promoter histone marks | Enhancer histone marks | DNase               | Proteins bound | eQTL tissues | Motifs changed | GENCODE genes | dbSNP func annot |
|-----|------------|----------------------|---------|------------------|-----|-----|----------|----------|----------|----------|------------|------------------------|------------------------|---------------------|----------------|--------------|----------------|---------------|------------------|
| 6   | 32190620   | 1                    | 1       | <b>rs3134931</b> | T   | C   | 0.45     | 0.36     | 0.56     | 0.31     |            |                        | HMEC, Huvec, GM12878   | Th1,Fibrobl,Osteobl | PU1            |              | p300           | NOTCH4        | intronic         |

Query SNP: **rs2857114** and variants with  $r^2 \geq 0.8$

| chr | pos (hg19) | LD (r <sup>2</sup> ) | LD (D') | variant            | Ref | Alt  | AFR freq | AMR freq | ASN freq | EUR freq | SiPhy cons | Promoter histone marks | Enhancer histone marks | DNase         | Proteins bound | eQTL tissues | Motifs changed      | GENCODE genes        | dbSNP func annot |
|-----|------------|----------------------|---------|--------------------|-----|------|----------|----------|----------|----------|------------|------------------------|------------------------|---------------|----------------|--------------|---------------------|----------------------|------------------|
| 6   | 32740761   | 0.81                 | 0.93    | <b>rs2621420</b>   | T   | C    | 0.65     | 0.64     | 0.74     | 0.68     |            |                        | HMEC, NHEK             |               |                |              | HDAC2,SP1B          | 9.4kb 5' of HLA-DQB2 |                  |
| 6   | 32760249   | 0.92                 | 0.96    | <b>rs2857160</b>   | T   | G    | 0.64     | 0.61     | 0.73     | 0.66     |            |                        |                        |               |                |              | 8 altered motifs    | 20kb 3' of HLA-DOB   |                  |
| 6   | 32760257   | 0.94                 | 0.98    | <b>rs2857159</b>   | T   | C    | 0.64     | 0.61     | 0.73     | 0.67     |            |                        |                        |               |                |              | 4 altered motifs    | 20kb 3' of HLA-DOB   |                  |
| 6   | 32760334   | 0.95                 | 0.99    | <b>rs2857158</b>   | A   | G    | 0.64     | 0.61     | 0.73     | 0.67     |            |                        |                        |               |                |              | 5 altered motifs    | 20kb 3' of HLA-DOB   |                  |
| 6   | 32760539   | 0.95                 | 0.99    | <b>rs2187687</b>   | T   | C    | 0.64     | 0.61     | 0.73     | 0.67     |            |                        |                        |               |                |              | 11 altered motifs   | 20kb 3' of HLA-DOB   |                  |
| 6   | 32760965   | 0.95                 | 0.99    | <b>rs2894294</b>   | G   | A    | 0.64     | 0.61     | 0.72     | 0.67     |            |                        | H7-hESC,NT2-D1         |               |                |              | Egr-1               | 20kb 3' of HLA-DOB   |                  |
| 6   | 32761317   | 0.96                 | 1       | <b>rs2857155</b>   | A   | G    | 0.64     | 0.62     | 0.72     | 0.67     |            |                        |                        |               |                |              | 14 altered motifs   | 19kb 3' of HLA-DOB   |                  |
| 6   | 32761507   | 0.96                 | 1       | <b>rs2187686</b>   | A   | G    | 0.62     | 0.62     | 0.73     | 0.67     |            |                        |                        |               |                |              | Hoxb8               | 19kb 3' of HLA-DOB   |                  |
| 6   | 32761776   | 0.96                 | 1       | <b>rs2157081</b>   | G   | A    | 0.64     | 0.62     | 0.72     | 0.67     |            |                        |                        |               |                |              | 4 altered motifs    | 19kb 3' of HLA-DOB   |                  |
| 6   | 32761826   | 0.96                 | 1       | <b>rs2157080</b>   | T   | C    | 0.64     | 0.62     | 0.72     | 0.67     |            |                        |                        |               |                |              | 10 altered motifs   | 19kb 3' of HLA-DOB   |                  |
| 6   | 32762103   | 0.96                 | 1       | <b>rs2157079</b>   | T   | C    | 0.64     | 0.62     | 0.72     | 0.67     |            |                        | GM12878                |               |                |              |                     | 18kb 3' of HLA-DOB   |                  |
| 6   | 32762226   | 0.95                 | 0.98    | <b>rs2157078</b>   | A   | G    | 0.64     | 0.61     | 0.72     | 0.67     |            |                        | GM12878                |               |                |              | HDAC2,p300          | 18kb 3' of HLA-DOB   |                  |
| 6   | 32762307   | 0.96                 | 1       | <b>rs2067098</b>   | T   | C    | 0.64     | 0.62     | 0.72     | 0.67     |            |                        | GM12878                | Adult_CD4_Th0 |                |              |                     | 18kb 3' of HLA-DOB   |                  |
| 6   | 32762484   | 0.96                 | 1       | <b>rs2067577</b>   | C   | G    | 0.64     | 0.62     | 0.72     | 0.67     |            |                        | GM12878                | 7 cell types  | PU1            |              | Foxo                | 18kb 3' of HLA-DOB   |                  |
| 6   | 32762616   | 0.96                 | 1       | <b>rs2857154</b>   | A   | G    | 0.64     | 0.62     | 0.72     | 0.67     |            |                        | GM12878                | CD20+         |                |              | Myc                 | 18kb 3' of HLA-DOB   |                  |
| 6   | 32762654   | 0.96                 | 1       | <b>rs2857152</b>   | A   | G    | 0.64     | 0.62     | 0.72     | 0.67     |            |                        | GM12878                | CD20+         |                |              | Foxc1,Hbp1,Nlx3     | 18kb 3' of HLA-DOB   |                  |
| 6   | 32763040   | 0.96                 | 1       | <b>rs2621378</b>   | G   | A    | 0.64     | 0.62     | 0.72     | 0.67     |            |                        |                        |               |                |              | 4 altered motifs    | 17kb 3' of HLA-DOB   |                  |
| 6   | 32763514   | 0.96                 | 1       | <b>rs2857151</b>   | A   | G    | 0.64     | 0.62     | 0.72     | 0.67     |            |                        |                        |               | MAFK           |              | En-1,Pax-5          | 17kb 3' of HLA-DOB   |                  |
| 6   | 32763521   | 0.96                 | 1       | <b>rs2621376</b>   | T   | C    | 0.64     | 0.62     | 0.72     | 0.67     |            |                        |                        |               | MAFK           |              | En-1,RFX5           | 17kb 3' of HLA-DOB   |                  |
| 6   | 32763821   | 0.96                 | 1       | <b>rs2857150</b>   | A   | G    | 0.64     | 0.62     | 0.72     | 0.67     |            |                        |                        |               |                |              | 29 altered motifs   | 17kb 3' of HLA-DOB   |                  |
| 6   | 32763974   | 0.95                 | 0.98    | <b>rs2621375</b>   | T   | C    | 0.64     | 0.61     | 0.72     | 0.67     |            |                        |                        |               |                |              | Zbtb3               | 17kb 3' of HLA-DOB   |                  |
| 6   | 32764719   | 0.96                 | 1       | <b>rs2187684</b>   | C   | T    | 0.63     | 0.62     | 0.72     | 0.67     |            |                        | 8 cell types           | H1            |                |              | Mef2,Pou2f2         | 16kb 3' of HLA-DOB   |                  |
| 6   | 32765383   | 0.96                 | 1       | <b>rs2257789</b>   | C   | A    | 0.63     | 0.62     | 0.72     | 0.67     |            |                        | 8 cell types           | H1, NHEK      | 28 cell types  | PU1,ELF1     | Spz1                | 15kb 3' of HLA-DOB   |                  |
| 6   | 32767091   | 0.96                 | 1       | <b>rs2621371</b>   | G   | T    | 0.63     | 0.62     | 0.72     | 0.67     |            |                        | GM12878                | Osteobl       |                | PU1,POL2     | 8 altered motifs    | 13kb 3' of HLA-DOB   |                  |
| 6   | 32770390   | 0.96                 | 1       | <b>rs1600571</b>   | G   | A    | 0.63     | 0.62     | 0.72     | 0.67     |            |                        |                        |               |                |              | ATF2,E4BP4,Hsf      | 10kb 3' of HLA-DOB   |                  |
| 6   | 32771354   | 0.96                 | 1       | <b>rs2621354</b>   | T   | G    | 0.63     | 0.62     | 0.72     | 0.67     |            |                        |                        |               | PU1            |              | Bcl6b               | 9.2kb 3' of HLA-DOB  |                  |
| 6   | 32771531   | 0.92                 | 0.96    | <b>rs2621353</b>   | G   | C    | 0.63     | 0.60     | 0.72     | 0.66     |            |                        |                        |               |                |              |                     | 9kb 3' of HLA-DOB    |                  |
| 6   | 32771610   | 0.96                 | 1       | <b>rs2857144</b>   | A   | G    | 0.63     | 0.62     | 0.72     | 0.67     |            |                        |                        |               |                |              | Hmbox1              | 8.9kb 3' of HLA-DOB  |                  |
| 6   | 32771887   | 0.96                 | 1       | <b>rs2621352</b>   | C   | T    | 0.63     | 0.62     | 0.72     | 0.67     |            |                        |                        |               |                |              | AP-2,NF-1,PTF1-beta | 8.7kb 3' of HLA-DOB  |                  |
| 6   | 32772004   | 0.96                 | 1       | <b>rs2621351</b>   | G   | T    | 0.63     | 0.62     | 0.72     | 0.67     |            |                        |                        |               |                |              | p300                | 8.5kb 3' of HLA-DOB  |                  |
| 6   | 32772086   | 0.86                 | 0.95    | <b>rs202007295</b> | TTG | T    | 0.59     | 0.60     | 0.68     | 0.66     |            |                        |                        |               |                |              | 10 altered motifs   | 8.5kb 3' of HLA-DOB  |                  |
| 6   | 32772087   | 0.93                 | 0.98    | <b>rs138384239</b> | TG  | T    | 0.61     | 0.62     | 0.71     | 0.67     |            |                        |                        |               |                |              | 17 altered motifs   | 8.5kb 3' of HLA-DOB  |                  |
| 6   | 32772504   | 0.91                 | 0.96    | <b>rs200016005</b> | G   | GCT  | 0.61     | 0.62     | 0.72     | 0.67     |            |                        |                        |               |                |              |                     | 8kb 3' of HLA-DOB    |                  |
| 6   | 32772505   | 0.91                 | 0.96    | <b>rs200139770</b> | C   | CTCT | 0.61     | 0.63     | 0.72     | 0.67     |            |                        |                        |               |                |              | CTCF                | 8kb 3' of HLA-DOB    |                  |
| 6   | 32772556   | 0.94                 | 0.98    | <b>rs2621350</b>   | C   | A    | 0.62     | 0.61     | 0.71     | 0.67     |            |                        |                        |               |                |              |                     | 8kb 3' of HLA-DOB    |                  |
| 6   | 32772564   | 0.84                 | 0.97    | <b>rs2621349</b>   | G   | C    | 0.58     | 0.59     | 0.69     | 0.64     |            |                        |                        |               |                |              | TCF4                | 8kb 3' of HLA-DOB    |                  |
| 6   | 32772575   | 0.84                 | 0.96    | <b>rs2621348</b>   | T   | G    | 0.59     | 0.59     | 0.71     | 0.64     |            |                        |                        |               |                |              | Foxp1,RREB-1        | 8kb 3' of HLA-DOB    |                  |
